# Supplementary material for: Effect of paternal overweight or obesity on IVF treatment outcomes and the possible mechanisms involved
Source: PubMed Central journal article supplement (PMC4944201; doi:10.1038/srep29787), 2016-07-14
Supplement: srep29787-s1.pdf [file srep29787-s1.pdf]

**Effect of paternal overweight or obesity on IVF treatment outcomes and the possible mechanisms involved.**

Qingling Yang<sup>△1</sup>, Feifei Zhao<sup>△1</sup>, Linli Hu<sup>△1</sup>, Nan Zhang<sup>1</sup>, Rui Bai<sup>1</sup>, Guidong Yao<sup>1</sup>, Yingpu Sun<sup>\*1</sup>

Reproductive Medical Center, First Affiliated Hospital of Zhengzhou University, China

<sup>△</sup>These authors contributed equally to this work.

**Running title: Effect of paternal overweight or obesity on IVF treatment outcomes**

**Disclosure summary:** The authors have nothing to disclose.

**Corresponding author and person to whom reprint requests should be addressed:**

Yingpu Sun, MD, PHD.

Center for Reproductive Medicine, The First Affiliated Hospital of Zhengzhou University

40, Daxue Road, Zhengzhou, Henan, China, 450052.

Tel: 86-371-66913635; Email: [syp2008@vip.sina.com](mailto:syp2008@vip.sina.com)

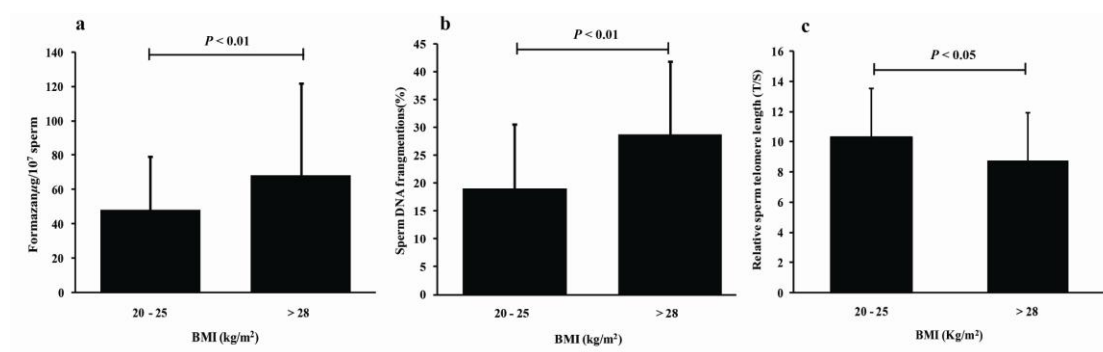

Supplementary Figure 1. ROS production, sperm DNA fragmentation rate and STL in the two groups. a. Comparison of mean ROS production in men with normal BMIs (20-25 kg/m<sup>2</sup>; N=50) and those with overweight BMIs (>28 kg/m<sup>2</sup>; N=54)(Mann-Whitney U test; bars represent standard deviation). b. Comparison of mean sperm DNA fragmentation rate among men with normal BMIs (20-25 kg/m<sup>2</sup>, N=50) and those with overweight BMIs (>28 kg/m<sup>2</sup>; N=54) (Student's *t* test; bars represent standard deviation). c. Comparison of relative STL (T/S ratio) in men with normal BMIs (20-25 kg/m<sup>2</sup>; N=50) and overweight BMIs (>28 kg/m<sup>2</sup>; N=306) (Student's *t* test; bars represent standard deviation).

Supplementary Table 1. Mitochondrial activity between the two BMI groups.

| Class         | Male BMI (kg/m <sup>2</sup> ) |            | <i>P</i> |
|---------------|-------------------------------|------------|----------|
|               | 20-25(N=345)                  | >28(N=306) |          |
| DAB Class I   | 4.1±2.4                       | 3.5±2.5    | 0.07     |
| DAB Class II  | 76.5±6.5                      | 73.8±6.5   | 0.03     |
| DAB Class III | 14.2±4.1                      | 11.8±4.1   | 0.04     |
| DAB Class IV  | 5.2±4.1                       | 10.9±4.0   | <0.01    |

Values are shown as the mean±standard deviation; Student's *t* test was used to compare the data between two groups.
